1 **DETECTION OF *Wolbachia* IN FIELD-COLLECTED MOSQUITO VECTOR, *Aedes***  
2 ***aegypti***

3 Thaddeus M. Carvajal<sup>1,2,3\*</sup>, Kazuki Hashimoto<sup>1</sup>, Reza Kurniawan Harnandika<sup>1</sup>, Divina M  
4 Amalin<sup>2,3</sup> and Kozo Watanabe<sup>1,2,3</sup>

5 <sup>1</sup> Department of Civil and Environmental Engineering - Ehime University, Matsuyama,  
6 Japan

7 <sup>2</sup> Biology Department – De La Salle University, Taft Ave Manila, Philippines

8 <sup>3</sup> Biological Control Research Unit, Center for Natural Science and Environmental Research  
9 - De La Salle University, Taft Ave Manila, Philippines

10 \*corresponding author: [tads.carvajal@gmail.com](mailto:tads.carvajal@gmail.com)

11 **ABSTRACT**

12 It was the impression from past literature that *Wolbachia* is not naturally found in *Ae. aegypti*.  
13 However, there are have been reports that recently reveals the presence of this endosymbiont  
14 in this mosquito vector. With this, our study presents additional support of *Wolbachia*  
15 infection in *Ae. aegypti* by screening field-collected adult mosquitoes using *Wolbachia*-  
16 specific 16S rDNA and its surface protein (*wsp*) makers under optimized PCR conditions.  
17 From a total of 672 *Ae. aegypti* adult mosquito samples collected in Metropolitan Manila,  
18 Philippines, 113 (16.8%) and 89 (13.2%) individual mosquito samples were determined to  
19 be *Wolbachia* infected using the *wsp* and 16S rDNA markers, respectively. The *Ae. aegypti*  
20 *wsp* sample sequences were similar or identical to five known *Wolbachia* strains belonging  
21 to supergroups A or B while majority of 16S rDNA sample sequences were similar to strains  
22 belonging to supergroup B. Overall, 80 (11.90%) individual mosquito samples revealed to  
23 show positive amplifications in both markers and 69.0% showed congruence in supergroup  
24 identification (supergroup B). Our findings illustrate that the infection status of *Wolbachia*  
25 in *Ae. aegypti* may appear common than previously recognized.

## 26 INTRODUCTION

27 Mosquitoes are considered to be medically important insects because of their capacity  
28 to carry notable human disease pathogens<sup>1</sup>. Among the known mosquito vectors, *Aedes*  
29 *aegypti* is an efficient and dangerous mosquito vector because of its ability to carry  
30 significant arboviral diseases such as Dengue, Chikungunya, Yellow Fever and Zika<sup>2,3</sup>.  
31 Despite the development of vaccines, these arboviral diseases are considered to be the leading  
32 cause of global disease burden<sup>4</sup> and thus, targeting the mosquito vector is deemed to be the  
33 primary control and prevention. A considerable number of vector control strategies had been  
34 implemented, but the disease burden continues to increase. Novel and newer approaches are  
35 being developed that shows promising outcomes in vector and disease control and one of  
36 which is the utilization of the intracellular bacterial endosymbiont, *Wolbachia*<sup>7-9</sup>.

37 *Wolbachia* is a naturally occurring endosymbiont which can be maternally inherited  
38 and cause different reproductive alterations in its host to increase their transmission to the  
39 next generation<sup>10-12</sup>. In insects, it is estimated to be naturally present in 60-65% of known  
40 species<sup>13</sup>. As to date, there are 17 identified major clades or supergroups (A-Q) where a  
41 majority are known to infect arthropods such as insects, arachnids, and crustaceans<sup>14</sup>. The  
42 pathogenic effects of *Wolbachia* in its host are well-studied and determined to cause sperm-  
43 egg incompatibility, parthenogenesis, cytoplasmic incompatibility, and feminization<sup>11,15</sup>.  
44 Therefore, utilizing these effects towards medically-important mosquito vectors, such as *Ae.*  
45 *aegypti*, has taken great research strides in the past two decades. The discovery of a virulent  
46 *Wolbachia* strain (*wMelPop*) in *Drosophila melanogaster* was successfully transferred to *Ae.*  
47 *aegypti* where it reduced the lifespan of the mosquito vector<sup>16-18</sup>. In addition to this, *wMelPop*  
48 and other *Wolbachia* strains (e.g., *wMel*) were able to demonstrate conferring resistance on  
49 a wide range of insect viruses, especially to human viral pathogens, such as dengue and  
50 chikungunya<sup>19-22</sup>. The life-shortening capability plus pathogen interference of this *Wolbachia*  
51 strain opened an avenue for its potential use as a biological control agent approach against  
52 mosquito-borne diseases. The World Mosquito Program  
53 (<https://www.worldmosquitoprogram.org>), formerly known as the Eliminate Dengue Project,

54 was able to generate stable *Wolbachia*-infected *Ae. aegypti* lines that possessed the ability of  
55 pathogen interference from dengue viruses under laboratory conditions. These *Wolbachia*  
56 strains showed maternal transmission rates close to 100% and induced high levels of  
57 cytoplasmic incompatibility to *Ae. aegypti*<sup>16</sup>. Semi-field cage experiments were also  
58 conducted to assess the fitness cost effect of the discovered strain towards the mosquito  
59 vector and its ability of these strains to invade the mosquito population. These experiments  
60 demonstrated the true potential of the endosymbiont because of the reduced fecundity of  
61 *Wolbachia*-infected *Ae. aegypti* as compared to the uninfected wildtype<sup>22</sup>. Australia became  
62 the first country to release these *Wolbachia*-infected *Ae. aegypti* into the wild population  
63 where it exhibited promising results<sup>23,24</sup>. As to date, this methodological strategy against the  
64 mosquito vector, *Ae. aegypti*, is now being tested in eight dengue-endemic countries such as  
65 Indonesia, Vietnam, Colombia, and Brazil (<https://www.worldmosquitoprogram.org>). It  
66 claimed this approach is considered to be cost-effective and safer for the environment than  
67 conventional insecticide-based measures<sup>19,25</sup>.

68 With the recognition of about 65% of known insects to be naturally infected with  
69 *Wolbachia* including those mosquito species from the genera of *Aedes*, *Culex*, *Mansonia*,  
70 major mosquito vectors of diseases such as *Ae. aegypti* and Anopheline mosquitoes were  
71 reported not to possess this endosymbiont<sup>26-31</sup>. It led to the belief that the presence of  
72 *Wolbachia* endosymbiont could be the reason why many of the mosquito species are  
73 considered to be weak vectors<sup>23</sup>. Nonetheless, more recent studies show evidence that  
74 *Wolbachia* infection in *Ae. aegypti* and *Anopheles gambiae* may appear to be more common  
75 than it was previously recognized. Natural *Wolbachia* infections have now been reported in  
76 adult, larvae and egg populations of *An. gambiae*<sup>32-34</sup>.

77 Lately, studies have reported detecting *Wolbachia* from field-collected *Ae. aegypti*  
78 samples using either *wsp* marker<sup>35</sup> or 16S metabarcoding<sup>36-37</sup>. Though these studies are  
79 commendable, there were still uncertainties in establishing whether the mosquito vector does  
80 harbor naturally the endosymbiont. Although metabarcoding studies had a substantial sample  
81 size (n=85-270), there were unable to report an accurate estimate of the infection rate because

82 mosquito adult or larval samples were pooled from each location. In contrast, *wsp* detection  
83 in *Ae. aegypti* larval samples<sup>35</sup> were screened individually, thus, was able to report the  
84 infection rate (50.0%). However, it was difficult to affirm or ascertain its true prevalence  
85 since the sample size was small (n=16 individuals). Moreover, there is possibility of a  
86 potential bias in reporting a high infection rate if larval samples were collected from the same  
87 water container due to the sampling of mosquito siblings from the same female mosquito.  
88 Nevertheless, these studies further suggest the likelihood of *Wolbachia* to be naturally  
89 associated with *Ae. aegypti*, thus, opening an avenue to re-visit or re-examine its infection  
90 status.

91 Our study aims to present additional support of *Wolbachia* infection found from field-  
92 collected *Ae. aegypti* adult mosquitoes using *Wolbachia*-specific 16S rDNA and the  
93 *Wolbachia* surface protein (*wsp*) markers. Based on the limitations presented from previous  
94 studies, two considerations were applied in addressing these gaps. First, *Wolbachia* screening  
95 was done over a large sample size (n=672) and used an individual-based detection of adult  
96 *Ae. aegypti* mosquitoes to gain a better estimate of its prevalence in this mosquito vector.  
97 Secondly, two molecular markers were used to confirm the detection status and infer the type  
98 of *Wolbachia* strains found in *Ae aegypti*.

## 99 **METHODS**

### 100 *Study area and Mosquito collection*

101 The study area is the National Capital Region of the Philippines or also known as  
102 Metropolitan Manila. Located on the Eastern shore of Manila Bay in Southwestern Luzon  
103 Island (14°50' N Latitude, 121°E Longitude), it is considered to be one of the highly  
104 urbanized and densely populated areas in the Philippines. Dengue disease is endemic in this  
105 region where it accounts for 15%-25% of the total number of reported Dengue cases annually  
106 in 2009 - 2014<sup>38</sup>. Vector control programs are being implemented in various localities of the  
107 region. Insecticide application and cleaning of the surroundings have been extensively used  
108 however its effectiveness is in question because of the constant and unchanging burden of

109 the disease. As to date, the Philippines, especially Metropolitan Manila, has never conducted  
110 any *Wolbachia*-based program against *Ae. aegypti*.

111 Adult mosquito samples were collected using a commercial branded mosquito UV-  
112 light trap (Jocanima®) installed in the outdoor premises of 138 residential households  
113 (sampling sites) from May 2014 – January 2015 (Figure 1a). Collected samples were then  
114 sorted and identified as *Ae. aegypti* using available keys<sup>39</sup>. Each sample was then placed in a  
115 tube with 99.5% ethanol for preservation. A total of 672 *Ae. aegypti* adult mosquito samples  
116 were collected, identified, labeled accordingly (See Supplementary Table 1) and stored at -  
117 20°C for subsequent processing.

#### 118 DNA Extraction, Polymerase Chain Reaction, and Sequencing

119 Total genomic DNA of each mosquito individual was extracted using the QIAGEN  
120 Blood and Tissue DNEasy Kit© following a modified protocol<sup>40</sup>. Our study used two  
121 molecular markers for detecting *Wolbachia* infection namely; *wsp*<sup>41</sup> and 16S rDNA<sup>42</sup>. The  
122 primer sequences are as follows: *wsp* 81F (5'TGG TCC AAT AAG TGA TGA AGA AAC)  
123 and *wsp* 691R (5' AAA AAT TAA ACG CTA CTC CA) for *wsp* marker while *Wspecf* (AGC  
124 TTC GAG TGA AAC CAA TTC) and *Wspecr* (GAA GAT AAT GAC GGT ACT CAC) for  
125 16S rDNA.

126 For *wsp* gene amplification, we followed the standard *wsp* protocol<sup>30</sup> where the  
127 suggested annealing temperature and number of cycles were 55 °C and 30 cycles respectively.  
128 In order to conduct an individual-based detection, we initially performed this protocol in  
129 *Culex quinquefasciatus* as our positive control. Certain modifications were made in the  
130 standard protocol based on the results where the annealing temperature was set to 57 °C and  
131 the number of cycles increased to 35 cycles. This initial modified protocol was performed in  
132 individual *Ae. aegypti* samples where it yielded positive faint bands. It prompted us to re-  
133 modify again the protocol where the annealing temperature is set at 59 °C with 40 cycles and  
134 the addition of 10% DMSO (Sigma-Aldrich®) that led to desirable results necessary for  
135 sequencing. Therefore, a 10  $\mu$ l final reaction volume was used and composed of 10X buffer  
136 (TAKARA®), 25 mM MgCl<sub>2</sub>, 10 mM of each dNTPs, 10  $\mu$ M forward and reverse primers,

137 10% DMSO (Sigma-Aldrich®) and 5.0U/  $\mu$ l of *Taq* DNA polymerase (TAKARA®). The  
138 final thermal profile consisted an initial denaturation of 95°C for 3 minutes, followed by  
139 another denaturation temperature of 95°C for 1 minute, an annealing temperature of 59°C for  
140 1 minute and an extension temperature of 72°C for 1 minute for 40 cycles, and accompanied  
141 by a final extension temperature at 72°C for 3 minutes.

142 On the other hand, 16S rDNA gene amplification used a 10  $\mu$ l final reaction volume  
143 and composed of 10X buffer (TAKARA), 25 mM MgCl<sub>2</sub>, 10 mM of each dNTPs, 10  $\mu$ M  
144 forward and reverse primers, 10% DMSO (Sigma-Aldrich®) and 5.0U/  $\mu$ L of *Taq* DNA  
145 polymerase (TAKARA®). Thermal profiles follow the protocol of Simões et al<sup>42</sup> with initial  
146 denaturation temperature at 95°C for 2 minutes, followed by two cycles of 95°C for 2 minutes  
147 of denaturation, annealing temperature of 60°C for 1 minutes and extension temperature of  
148 72°C for 1 minute, afterwards 35 cycles of denaturation of 95°C for 30 seconds, annealing  
149 temperature of 60°C for 1 minute and extension temperature of 72°C for 45 seconds and final  
150 extension at 72°C for 10 minutes.

151 All PCR amplification experiments included positive and negative controls. The  
152 positive control is a *Wolbachia*-infected *Cu. quinquefasciatus* sample while the negative  
153 control consisted of water as the template. The product size of each molecular marker was  
154 checked through electrophoresis with 1.5% agarose gel set at 100 volts for 30 minutes. The  
155 size of the amplified *wsp* gene is 610 bp while the 16S rDNA gene is 438 bp. PCR  
156 amplification process underwent two replicates to validate the results obtained (See  
157 Supplementary Table 1). A third screening was performed for selected individual samples  
158 that had conflicting results based on the two prior replicates. Therefore, the criteria set in  
159 reporting the certainty for *Wolbachia* infection is based on two successful amplification of  
160 the molecular markers. Amplified PCR products from each molecular marker were sent for  
161 sequencing to Eurofins, Operon – Tokyo.

162 Identity of *Wolbachia* strains and their positions in phylogroups

163 All sequences were subjected to the Nucleotide Basic Local Alignment Search Tool  
164 (BLAST) and compared to deposited *Wolbachia* sequences in GENBANK. Next, selected  
165 sequences of *Wolbachia* strains (Table 1) and those obtained in the study underwent multiple  
166 alignment using Clustal W in MEGA 6<sup>43</sup>. After editing, the final length used for phylogenetic  
167 inference analyses was 398 bp and 732 bp for *wsp* and 16S rDNA respectively. The identities  
168 and relationships of the *Wolbachia* strains obtained in our study were determined by  
169 performing the Bayesian method in PhyML 3.0 software with 1000 bootstrap replicates<sup>44</sup>.  
170 The Smart Model Selection<sup>45</sup> was also utilized to set the parameters for *wsp* as GTR+G  
171 (number of estimated parameters  $k = 232$ , Akaike Information Criterion (AIC) = 4897.31702)  
172 and 16S rDNA as GTR+G+1 (number of estimated parameters  $k = 207$ , Akaike Information  
173 Criterion (AIC) = 5332.88688). All sample sequences were submitted to GENBANK with  
174 Accession numbers \_\_\_\_\_ - \_\_\_\_\_.

175 Statistical Analysis

176 A Clark-Evans test was performed to determine if the spatial distribution of  
177 *Wolbachia*-positive mosquito samples from each molecular marker have a pattern of  
178 complete spatial randomness. The test uses the aggregation index ( $R$ ) where a value of  $> 1$   
179 suggests an ordered distribution and a value of  $< 1$  suggests clustering. This analysis was  
180 performed using R program version 3.3.5<sup>46</sup> under package *spatstat*<sup>46</sup>

181 **Table 1.** Representative *Wolbachia* type sequences from different insect hosts in *wsp* and  
182 16S rDNA molecular markers.

| <b>Molecular Marker</b>     | <b>Host</b>                            | <b>Wolbachia supergroup</b>   | <b>Accession Number</b> |        |
|-----------------------------|----------------------------------------|-------------------------------|-------------------------|--------|
| wsp                         | <i>Drosophila melanogaster</i>         | A                             | AF020072                |        |
|                             | <i>Aedes albopictus</i>                | A                             | AF020058                |        |
|                             | <i>Glossina morsitans</i>              | A                             | AF020079                |        |
|                             | <i>Drosophila simulans</i> (Riverside) | A                             | AF020070                |        |
|                             | <i>Muscidifurax uniraptor</i>          | A                             | AF020071                |        |
|                             | <i>Phlebotomus papatasi</i>            | A                             | AF020082                |        |
|                             | <i>Glossina austeni</i>                | A                             | AF020077                |        |
|                             | <i>Culex pipiens</i>                   | B                             | AF020061                |        |
|                             | <i>Culex quinquefasciatus</i>          | B                             | AF020060                |        |
|                             | <i>Aedes albopictus</i>                | B                             | AF020059                |        |
|                             | <i>Ephestia cautella</i>               | B                             | AF020076                |        |
|                             | <i>Dirofilaria immitis</i>             | C (Outgroup)                  | AJ252062                |        |
|                             | 16S                                    | <i>Nasonia longicornis</i>    | A                       | M84691 |
|                             |                                        | <i>Muscidifurax uniraptor</i> | A                       | L02882 |
| <i>Aedes albopictus</i>     |                                        | B                             | KX155506                |        |
| <i>Culex pipiens</i>        |                                        | B                             | X61768                  |        |
| <i>Nasonia vitripennis</i>  |                                        | B                             | M84686                  |        |
| <i>Onchocera volvulus</i>   |                                        | C                             | AF069069                |        |
| <i>Dirofilaria immitis</i>  |                                        | C                             | Z49261                  |        |
| <i>Litomosa westi</i>       |                                        | D                             | AJ548801                |        |
| <i>Folsomia candida</i>     |                                        | E                             | AF179630                |        |
| <i>Mansonella ozzardi</i>   |                                        | F                             | AJ279034                |        |
| <i>Dipetalonema gracile</i> |                                        | J                             | AJ548802                |        |
| <i>Rickettsia sp.</i>       |                                        | Outgroup                      | U11021                  |        |



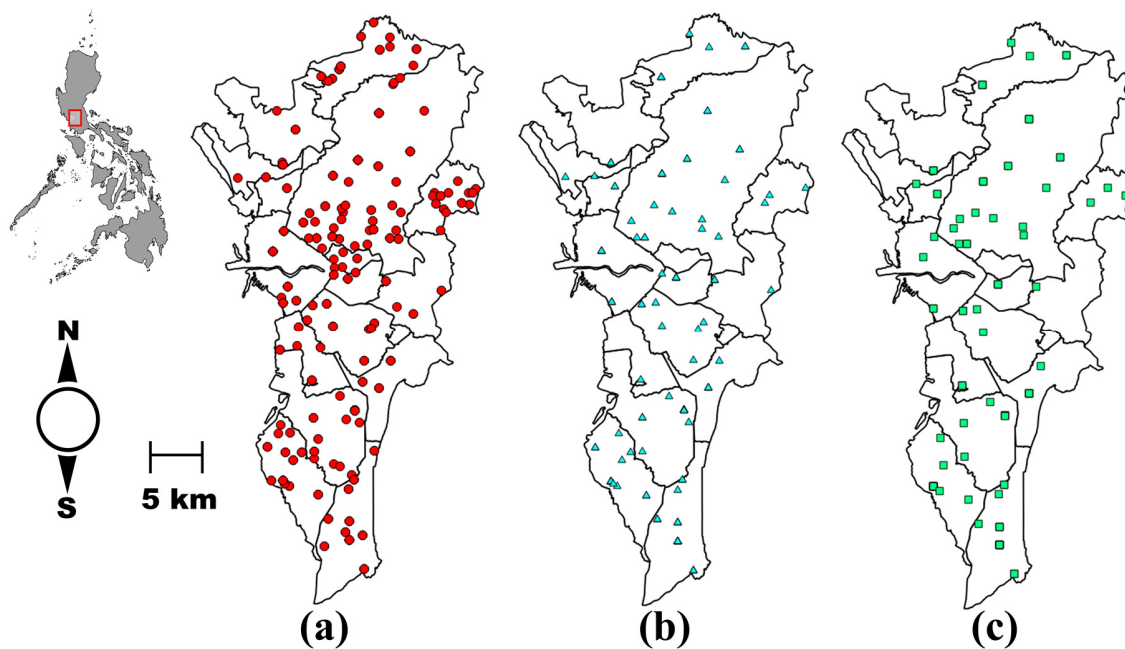

183 **Fig 1.** (a) Spatial distribution of the sampling sites (n=138) for collecting adult *Ae. aegypti*.  
184 *Wolbachia*-positive sampling sites based on *wsp* (b) and 16S rDNA (c). Details of the number  
185 of *Wolbachia*-positive mosquitoes per sampling site is found in the Table S1.

## 186 **RESULTS**

### 187 Detection of *Wolbachia* through *wsp* and its phylogeny

188 From a total of 672 adult *Ae. aegypti* screened, 113 (16.8%) individual adult mosquito  
189 samples are infected with *Wolbachia* using the *wsp* marker (Table 2). Based on the study's  
190 criterion (See methods), only 17 samples demonstrated one successful amplification, thus  
191 excluding them for further analysis. In addition, female/male ratio is 0.82 (Table 2). All  
192 sequenced amplicons resulted in a high degree of similarity (>98.0%) with deposited *wsp*  
193 sequences in GENBANK. The spatial distribution showed that 60 (43.0%) sampling sites  
194 (Figure 1b) contained *Wolbachia* positive mosquitoes with 1 – 8 individuals. Further analysis  
195 showed that the distribution of *wsp*-positive mosquito samples was significantly clustered ( $R$   
196 = 0.003,  $p < 0.001$ ). Figure 2 and Figure S1 show the phylogeny of *Wolbachia* sequences  
197 based on *wsp* sequences. Majority of the sequences were found in supergroup B (n=84) while

198 the remaining were clustered in supergroup A (n=29). Based on descending order of sample  
 199 sizes, sample sequences in supergroup B were identical (>99.0%) to *Wolbachia* type strains  
 200 from selected hosts of *Ae. albopictus* (*wAlbB*) (n= 51), *Cu. quinquefasciatus*, *Cu. pipiens*  
 201 (*wPip*), *Ae. aegypti* *wMel* strain (n= 23) and *Ephestia cautella* (*wCau*) (n= 10). The sample  
 202 sequences from supergroup A were either similar (98.0-99.0%) (n = 8) or identical (>99.0%)  
 203 (n= 21) to the type strain (*wAlbA*) from host *Ae. albopictus*.

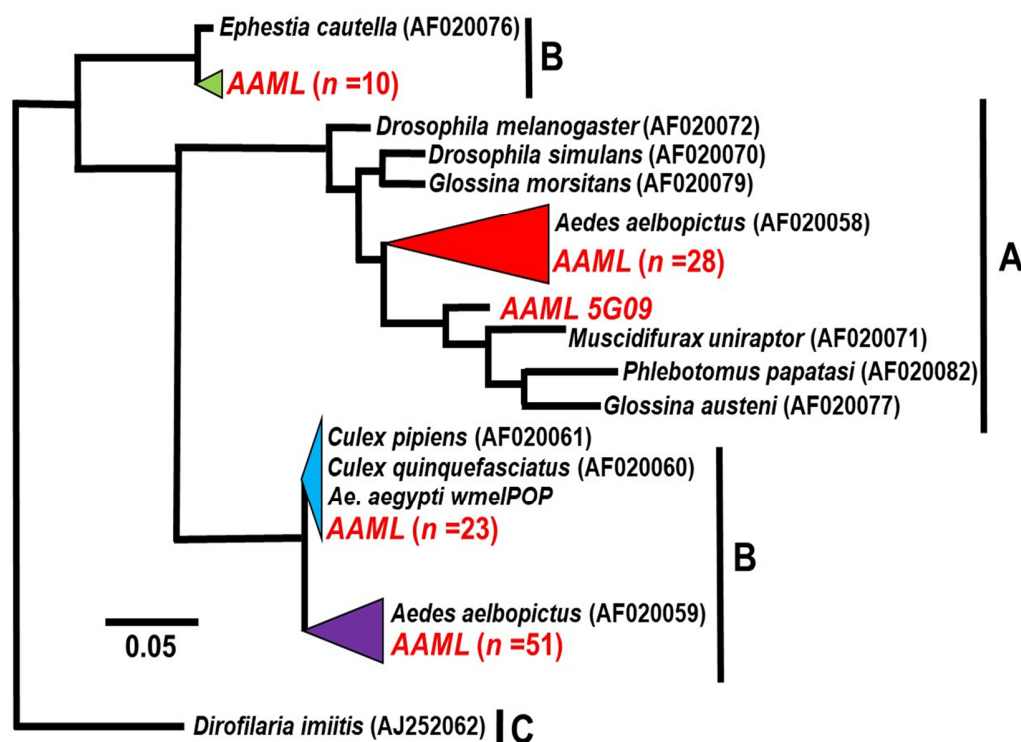

204 **Fig 2.** Phylogenetic analysis of *wsp*. The alignment was analyzed in PhyML. Sample sequences  
 205 of *Ae.aegypti* collected in Metropolitan Manila are in red, labeled as AAML (A*e.* a*e*gypti  
 206 MetropolitanManiLa) and alphanumeric values indicate the unique code assigned to each  
 207 *Ae. aegypti* individual sample. Merging (triangles) of sample and representative *Wolbachia*  
 208 sequences was done to show degree of similarity (98-100%). Supergroups were indicated as  
 209 A – C depending on the representative sequences used. The phylogenetic trees are re-drawn

210 for better visualization, thus an expanded version can be viewed in Supplemental Figure S1.  
211 Please refer to Table 1 for the *Wolbachia* type sequences (ingroup and outgroup) for both  
212 markers.

### 213 Detection of *Wolbachia* through 16S rDNA and its phylogeny

214 For 16S rDNA, 89 (13.2%) individual adult mosquito samples were infected with  
215 *Wolbachia* (Table 2). 20 individual mosquito samples generated one successful 16S rDNA  
216 amplification, thus, excluding them for further analysis. Furthermore, female/male ratio is  
217 0.85 (Table 2). 50 (36.0%) sampling sites (Figure 1c) contained *Wolbachia*-positive  
218 mosquitoes ranging from 1-8 individuals and the distribution of 16SrDNA-positive  
219 individuals revealed to be clustered or aggregated ( $R = 0.001, p < 0.001$ ). All sequenced  
220 amplicons resulted in a high degree of similarity (>98%) with deposited 16S rDNA  
221 *Wolbachia* sequences in GENBANK. Nearly all 16S rDNA sample sequences (n=85) (Figure  
222 3, Figure S2) were grouped in supergroup B. Only one sample sequence was identical to  
223 *Nasonia vitripennis* while the remaining sample sequences were up to 99% similar from the  
224 selected hosts of the supergroup. The remaining sample sequences (n=4) were grouped in  
225 supergroup C & J. One sample sequence was highly similar (>99%) with *Dirofilaria immitis*  
226 while the remaining were 98-99% similar from the selected hosts of the supergroup.

### 227 Comparison of 16S rDNA and *wsp* for *Wolbachia* detection and phylogeny

228 From the 113 and 89 positively detected mosquito individuals from *wsp* and 16S  
229 rDNA respectively, 80 (11.90%) individual samples yielded positive amplification in both  
230 markers (Table 2). In *wsp* positive detection (n=113), 80 had two successful amplification of  
231 the 16S rDNA marker while 27 had only one amplification of 16S rDNA and the remaining  
232 6 had no successful amplification on 16S rDNA marker. On the other hand, the 89 individual  
233 samples deemed 16S rDNA positive for *Wolbachia* showed 80 individuals had two  
234 successful amplification of the *wsp* marker while 9 had only one successful amplification on  
235 the said marker. Next, we focus on the supergroup classification of the 80 individual samples  
236 based on the *wsp* and 16S rDNA phylogeny. It was shown that 55 (69%) had the same  
237 classification in supergroup B while the remaining 25 (31%) showed a disparity in

238 supergroup classification. Such difference, for example, showed that *wsp* identified the  
 239 individual sample as supergroup A, but 16S rDNA reveals to be either supergroup B or C &  
 240 J.

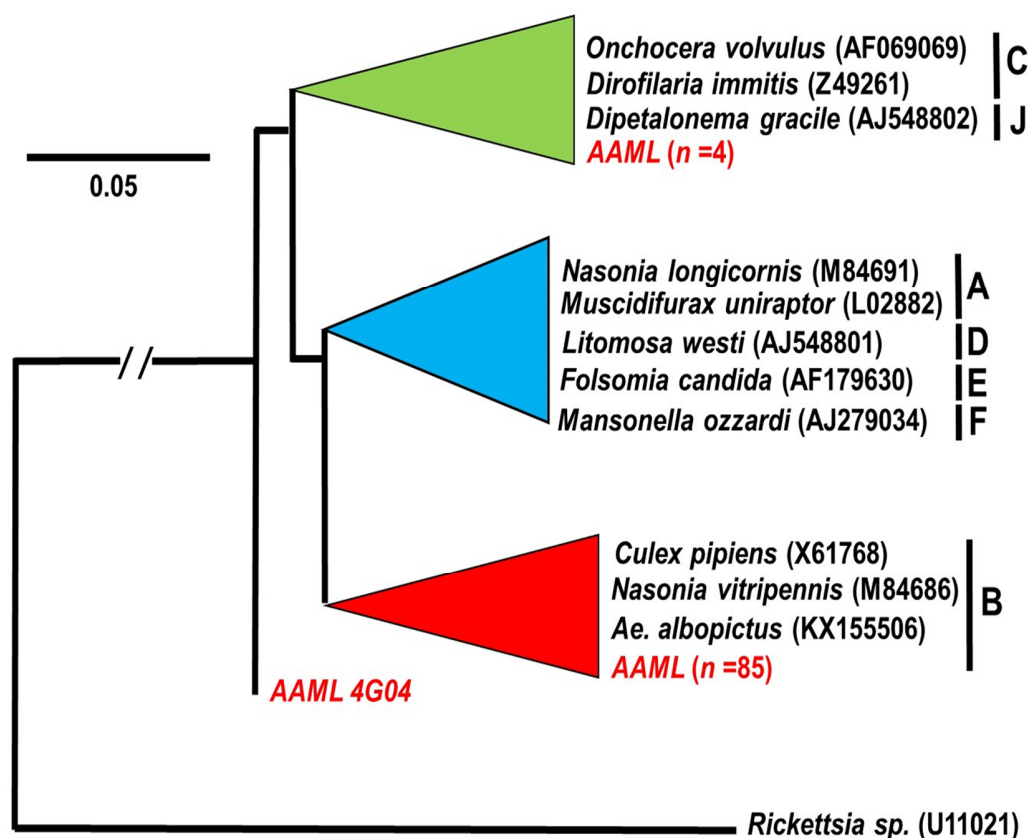

241 **Fig 3.** Phylogenetic analysis of 16S rDNA. The alignment was analyzed in PhyML. Sample  
 242 sequences of *Ae.aegypti* collected in Metropolitan Manila are in red, labeled as AAML (A  
 243 a*e*gypti Metropolitanananamanila) and alphanumeric values indicate the unique code assigned to  
 244 each *Ae. aegypti* individual sample. Merging (triangles) of sample and representative  
 245 *Wolbachia* sequences was done to show degree of similarity (98-100%). Supergroups were  
 246 indicated as A – J depending on the representative sequences used. The phylogenetic trees  
 247 are re-drawn for better visualization, thus an expanded version can be viewed in  
 248 Supplemental Figure S2. Please refer to Table 1 for the *Wolbachia* type sequences (ingroup  
 249 and outgroup) for both markers.

250 **Table 2.** Summary of *wsp* and 16S rDNA detection results in *Ae. aegypti*

| Molecular markers    | Number of individuals detected (n=672) | Female (n=379) | Male (n=293) | Female/Male ratio |
|----------------------|----------------------------------------|----------------|--------------|-------------------|
| <i>wsp</i>           | 113 (16.82%)                           | 52             | 61           | 0.82              |
| 16S rDNA             | 89 (13.24%)                            | 41             | 48           | 0.85              |
| <i>wsp</i> +16S rDNA | 80 (11.90%)                            | 36             | 44           | 0.82              |

251

## 252 DISCUSSION

253 Our study was able to demonstrate the detection of the endosymbiont *Wolbachia* in  
254 field-caught adult *Ae. aegypti*. Notably, the main reason for the positive detection, especially  
255 in *wsp*, is because of the procedural modifications or optimization in the amplification of the  
256 said marker. A case in point, for example, why optimization is necessary is the evidence  
257 presented in the malaria mosquito vector, *An. gambiae*. Previous studies had reported no  
258 observed natural *Wolbachia* infection in this mosquito vector<sup>26-31</sup>; however, the  
259 endosymbiont was successfully detected in *An. gambiae* from Burkina Faso, West Africa  
260 using an optimized *wsp* protocol<sup>32,33</sup>. Another potential reason for a positive detection was  
261 the study's sample size. Based on several literature on assessing the prevalence of *Wolbachia*  
262 in different mosquito species, the highest number of *Ae. aegypti* individuals screened was  
263 119<sup>30</sup> which resulted in non-detection of the endosymbiont. As compared to the actual study  
264 (n= 672), the sample sizes from previous studies were low; thus, larger sample size would  
265 provide a more accurate estimate of the prevalence of *Wolbachia* infection. Similarly, these  
266 reasons were clearly emphasized by recent studies on why earlier investigations may have  
267 underestimated the actual incidence of *Wolbachia* infection from different insect hosts<sup>48,49</sup>.

268 Our study acknowledges the uncertainties associated with conventional PCR  
269 detection such as high false positive detection rates. With this in mind, the study was cautious  
270 in affirming a positive infection in each *Ae. aegypti* adult sample. First, the selection of  
271 markers is based on the recommendation of Simoes et al.<sup>42</sup> that two of its preferred primer

272 sets (e.g. *Wspecf* and *Wspecr*) was determined to produce the lowest false positive and false  
273 negative rates. Secondly, our study performed replications with a stringent criterion for a  
274 successful *Wolbachia* infection on each mosquito sample. Although there are several genetic  
275 markers (e.g. MLST genes) and techniques (e.g. IFA, FISH or whole-genome sequencing)  
276 available, the primary intention of this study is to detect *Wolbachia* infection in *Ae. aegypti*  
277 initially using this PCR-Based approach.

278 Linking our findings with the previous studies<sup>35-37</sup> which reported *Wolbachia* in *Ae.*  
279 *aegypti* may incidentally provide a clear picture of its infection status. First, the probable  
280 density of the endosymbiont found in this mosquito vector may be low. Even though our  
281 study did not measure the actual density, a 40-cycle PCR amplification procedure or a long  
282 PCR run<sup>50</sup> may detect a small amount of *Wolbachia* present. It partly supports the results  
283 presented from metabarcoding studies<sup>36,37</sup> where a low number (2-4) of *Wolbachia* sequence  
284 reads were detected in both the larvae and adult *Ae. aegypti* mosquito. These can be another  
285 potential reason why earlier prevalence studies were not able to detect *Wolbachia* in *Ae.*  
286 *aegypti* samples. Moreover, the low probable density of the endosymbiont may also translate  
287 to the observed low infection rate (13-16%) found in our study. This again partly supports  
288 metabarcoding studies<sup>36,37</sup> where only two *Ae. aegypti* mosquito pools had the presence of  
289 these low number *Wolbachia* sequences. On the other hand, our results are in contrast with  
290 the report from *Ae. aegypti* larvae (n=16 individuals) in Malaysia which resulted in a 50%  
291 infection rate<sup>35</sup>. However, there could be some uncertainties to this estimate because of its  
292 small sample size and, more importantly, the collected larval samples may be siblings from  
293 the same female *Ae. aegypti* mosquito. The limitation as mentioned earlier prompted us to  
294 conduct an individual-based adult mosquito detection so that it can present a better and  
295 explicit estimation of the infection rate. Secondly, we assume that the *Wolbachia* strain/s  
296 found in *Ae. aegypti* can be maternally-inherited due to the following reasons: (a) reported  
297 positive infections in larval samples from the previous studies<sup>35-37</sup> and (b) detecting positive  
298 infections in male *Ae. aegypti* mosquitoes (our study, Table 2). However, there is still a need  
299 to present direct evidence of maternal transmission of this endosymbiont during the

300 developmental stages of *Ae. aegypti* since all studies, including ours, were performed  
301 independently.

302         Lastly, the *Wolbachia* strains infecting *Ae. aegypti* have been shown in our study  
303 belong to supergroups A and B. Both *wsp* and 16S rDNA phylogeny showed that majority  
304 of the individual samples belong to supergroup B while a small number of individual samples  
305 were found in supergroup A (based on *wsp*). Detecting different *Wolbachia* strains in a single  
306 mosquito species is relatively common especially in medically important mosquitoes, *Ae.*  
307 *albopictus*<sup>51,52</sup> and *An. gambiae*<sup>32</sup>, and other insect host species (e.g. *Drosophila* species<sup>51</sup>).  
308 Since our study presented a majority of our sample sequences belonging to supergroup B,  
309 this was also the same observation reported by previous studies<sup>35-37</sup>. Dipterans, especially  
310 mosquitoes, are commonly infected by these *Wolbachia* strains from supergroups, A and B.  
311 It has been shown to cause parasitism towards its insect host by producing phenotype effects  
312 such as cytoplasmic incompatibility, male killing, and feminization<sup>11,53</sup>. Nevertheless,  
313 whether the identified *Wolbachia* strains in *Ae. aegypti* possess these phenotypic effects  
314 remains unclear. Also, further studies are needed to ascertain the pathogenic impact of this  
315 local endosymbiont to the mosquito vector. More importantly, it is very essential to determine  
316 whether these identified *Wolbachia* strains could render *Ae. aegypti* a less effective vector by  
317 blocking key arboviruses such as dengue. It is also worth mentioning that some individual  
318 samples have shown to be similar with *Wolbachia* strains found in supergroups C and J based  
319 on 16S rDNA. These two supergroups are not generally found in dipterans especially in  
320 mosquitoes. It is likely that our 16S rDNA amplified the *Wolbachia* strain residing in the  
321 roundworm, *Dirofilaria immitis*. *Ae. aegypti* mosquitoes are also known to carry this parasitic  
322 nematode to certain mammals, such as dogs<sup>54</sup>. This observation was also reported in one of  
323 the metabarcoding studies<sup>37</sup> that showed sequences of *Wolbachia* from *Dirofilaria immitis*.  
324 However, when these 16S rDNA results were compared to the *wsp* results in our study, it  
325 showed the *Wolbachia wsp* sample sequence of the same mosquito individuals belong to  
326 supergroup B. We can only infer that the inconsistent results observed in our study may stem  
327 towards the sensitivity and specificity of the markers used. The *wsp* gene marker has been  
328 likened to antigen protein typing in screening pathogenic bacteria where it can be a perfect

329 diagnostic tool for detecting *Wolbachia* infection<sup>55,56</sup>. However, it is unsuitable for  
330 phylogenetic analysis or deeper taxonomic relationship because of its extensive  
331 recombination and strong diversifying selection<sup>11,57,58</sup>. 16S rDNA, on the other hand, is  
332 known to be a conserved gene highly suited in bacterial identification and phylogeny, but its  
333 use in detecting *Wolbachia* infection has demonstrated varying results depending on the  
334 specific 16S rDNA primers<sup>42</sup>. It was emphasized that “no single protocol” can ultimately  
335 ensure the specificity and accuracy of 16S rDNA to detect *Wolbachia* infection<sup>56</sup>. Thus,  
336 further claiming that 16S rDNA markers in *Wolbachia* detection may be far from optimal<sup>56</sup>.

337 We consider our findings to be crucially important especially if the Philippines would  
338 implement or approve two scenarios in the release of: (a) *Wolbachia*-infected (e.g. *wMelPop*  
339 or *wMel*) mosquitoes or (b) local *Wolbachia* strains found by our study in dengue-endemic  
340 areas. In the first scenario, a vital consideration is the presence of “bidirectional  
341 incompatibility” mechanism between the intended *Wolbachia* strain (e.g. *wMelPop* or *wMel*)  
342 to be released and the present local strain found in the mosquito. There are instances that two  
343 strains in one host cannot stably coexist with each other because the naturally occurring strain  
344 is preventing the intended strain to reach fixation or establishment<sup>59-61</sup>. It would serve as an  
345 impediment to the intentional spread of *Wolbachia* strain to the mosquito population. It was  
346 suggested that to overcome this incompatibility is to remove the existing natural strain  
347 inhabiting the mosquito vector or to perform a “superinfection” where the intended  
348 *Wolbachia* strain induces unidirectional incompatibility with the natural strain<sup>62</sup>.  
349 Nevertheless, it very important to re-examine the infection status of *Wolbachia* in *Ae. aegypti*  
350 mosquitoes in intended areas prior a mass release program. If the second scenario, utilizing  
351 the release of local *Wolbachia* strains, is implemented, there are specific considerations that  
352 should be addressed for a successful population replacement. The first and most important  
353 consideration is to determine whether these local strains may exhibit the same phenotypic  
354 effects and pathogen blocking of *wMel* strain to *Ae. aegypti*. Currently, these characteristics  
355 are still unknown and therefore crucial if utilized for mass release. Another consideration is  
356 endosymbiont’s density in the mosquito vector. Mosquito species naturally infected with  
357 *Wolbachia* are not ideal candidates due to the changing molecular interactions between



358 *Wolbachia* and the host over time<sup>63</sup>. The result of this symbiosis is the amount of bacterial  
359 density found in the mosquito host where it can influence the intensity of *Wolbachia*-induced  
360 phenotypic or anti-viral effects<sup>22,62,64,65</sup>. Newer infections (e.g. tansinfections) are shown to  
361 produce high bacterial density while natural infections lead to lower bacterial density due to  
362 the adaptation of the host to the endosymbiont infection over time. In our study, we infer that  
363 the local *Wolbachia* strains are in low density inside its host, *Ae. aegypti*. If this is the case,  
364 it will result in a reduced physiological and anti-viral impact of the strain to the mosquito  
365 vector. However, high *Wolbachia* density which also possesses strong inhibitory effects  
366 against insect viruses had been observed from natural *Wolbachia* strains with a long-term  
367 association from its host<sup>66,67</sup>. The last consideration is the low infection rate. It raises the  
368 question, more importantly to the population replacement approach, if any of the local  
369 *Wolbachia* strains could be sustained for an extended period or possess the ability to infect  
370 the mosquito population thoroughly. Studies had suggested that a successful strain used in  
371 population replacement or invasion should reach an infection rate of >90% and should remain  
372 at this rate over an extended period of time<sup>68-70</sup>. Thus, utmost consideration in the infection  
373 status of *Wolbachia* and its role in *Ae. aegypti* is necessary for a *Wolbachia*-based vector  
374 control program to be successful, efficient and, as well as, effective.

## 375 **ACKNOWLEDGEMENTS**

376 We would like to thank M.J.L.B. Martinez, J.D.R. Capistrano, V.S.P. Tiopianco, B.M.C  
377 Orantia, C.R. Estrada, M.G. Cuenca, K.M. Viacrusis and L.F.T. Hernandez for their valuable  
378 work in the collection of the mosquitoes. Also we are grateful to the valuable and pertinent  
379 comments of the anonymous reviewers. This work is funded by the JSPS Grant-in-Aid for  
380 Scientific Research (16H05750, 17H01624, 17K18906), JSPS Bilateral Joint Research  
381 Projects, and Leading Academia in Marine and Environmental Pollution Research – Ehime  
382 University (Y29-1-8)

383 **AUTHOR CONTRIBUTIONS**

384 T.M.C., D.M.A. and K.W. designed the experiments. T.M.C., K.H., and R.K.H. performed  
385 the experiments. T.M.C., K.H., and R.K.H. performed the sequencing while T.M.C., K.W.  
386 and D.M.A. accomplished the phylogenetic analysis. T.M.C. wrote the manuscript along with  
387 D.M.A and K.W. All authors reviewed the manuscript and approved on its submission.

388 **REFERENCES**

- 389 1. Juliano, Steven A., and L. Philip Lounibos. Ecology of invasive mosquitoes: effects  
390 on resident species and on human health. *Ecology letters* 8.5: 558-574 (2005).
- 391 2. Powell, Jeffrey R., and Walter J. Tabachnick. History of domestication and spread of  
392 *Aedes aegypti*-A Review. *Memorias do Instituto Oswaldo Cruz* 108: 11-17 (2013).
- 393 3. Morrison, Amy C., et al. Defining challenges and proposing solutions for control of  
394 the virus vector *Aedes aegypti*. *PLoS medicine* 5.3: e68 (2008).
- 395 4. Stanaway JD, Shepard DS, Undurraga EA, Halasa YA, Coffeng LE, Brady OJ, Hay  
396 SI, Bedi N, Bensenor IM, Castañeda-Orjuela CA, Chuang TW. The global burden of  
397 dengue: an analysis from the Global Burden of Disease Study. *The Lancet infectious*  
398 *diseases*. 2016 Jun 30;16(6):712-23 (2013)
- 399 5. Achee NL, Gould F, Perkins TA, Reiner Jr RC, Morrison AC, Ritchie SA, Gubler DJ,  
400 Teyssou R, Scott TW. A critical assessment of vector control for dengue prevention.  
401 *PLoS neglected tropical diseases*. May 7;9(5):e0003655 (2015).
- 402 6. Reiner Jr RC, Achee N, Barrera R, Burkot TR, Chadee DD, Devine GJ, Endy T,  
403 Gubler D, Hombach J, Kleinschmidt I, Lenhart A. Quantifying the epidemiological  
404 impact of vector control on dengue. *PLoS neglected tropical diseases*. May  
405 26;10(5):e0004588 (2016).
- 406 7. Kamtchum-Tatuene J, Makepeace BL, Benjamin L, Baylis M, Solomon T. The  
407 potential role of *Wolbachia* in controlling the transmission of emerging human  
408 arboviral infections. *Current opinion in infectious diseases*. Feb;30(1):108 (2017).

- 409 8. Murray JV, Jansen CC, De Barro P. Risk associated with the release of Wolbachia-  
410 infected *Aedes aegypti* mosquitoes into the environment in an effort to control dengue.  
411 *Frontiers in public health.*;4 (2016).
- 412 9. Bourtzis K, Dobson SL, Xi Z, Rasgon JL, Calvitti M, Moreira LA, Bossin HC,  
413 Moretti R, Baton LA, Hughes GL, Mavingui P. Harnessing mosquito–Wolbachia  
414 symbiosis for vector and disease control. *Acta tropica.* Apr 30;132:S150-63 (2014).
- 415 10. Serbus LR, Casper-Lindley C, Landmann F, Sullivan W. The genetics and cell  
416 biology of Wolbachia-host interactions. *Annual review of genetics.* Dec 1;42:683-  
417 707 (2008).
- 418 11. Werren JH, Baldo L, Clark ME. Wolbachia: master manipulators of invertebrate  
419 biology. *Nature reviews. Microbiology.* Oct 1;6(10):741 (2008).
- 420 12. Saridaki A, Bourtzis K. Wolbachia: more than just a bug in insects genitals. *Current*  
421 *opinion in microbiology.* Feb 28;13(1):67-72 (2010).
- 422 13. Rasgon JL. Using predictive models to optimize Wolbachia-based strategies for  
423 vector-borne disease control. *Transgenesis and the Management of Vector-Borne*  
424 *Disease.*:114-25 (2008).
- 425 14. Glowska, Eliza, Anna Dragun-Damian, Mirosława Dabert, and Michael Gerth. "New  
426 Wolbachia supergroups detected in quill mites (Acari: Symbiophoridae)." *Infection,*  
427 *Genetics and Evolution* 30: 140-146 (2015).
- 428 15. Ahmed MZ, Breinholt JW, Kawahara AY. Evidence for common horizontal  
429 transmission of Wolbachia among butterflies and moths. *BMC evolutionary biology.*  
430 2016 May 27;16(1):118.
- 431 16. McMeniman CJ, Lane RV, Cass BN, Fong AW, Sidhu M, Wang YF, O'Neill SL.  
432 Stable introduction of a life-shortening Wolbachia infection into the mosquito *Aedes*  
433 *aegypti*. *Science.* 2009 Jan 2;323(5910):141-4.
- 434 17. Xi Z, Khoo CC, Dobson SL. Wolbachia establishment and invasion in an *Aedes*  
435 *aegypti* laboratory population. *Science.* 2005 Oct 14;310(5746):326-8.

- 436 18. Min, Kyung-Tai, and Seymour Benzer. "Wolbachia, normally a symbiont of  
437 *Drosophila*, can be virulent, causing degeneration and early death." Proceedings of  
438 the National Academy of Sciences 94, no. 20: 10792-10796 (1997).
- 439 19. Dutra HL, Rocha MN, Dias FB, Mansur SB, Caragata EP, Moreira LA. Wolbachia  
440 blocks currently circulating Zika virus isolates in Brazilian *Aedes aegypti* mosquitoes.  
441 Cell host & microbe. 2016 Jun 8;19(6):771-4.
- 442 20. Aliota MT, Walker EC, Yepes AU, Velez ID, Christensen BM, Osorio JE. The wMel  
443 strain of Wolbachia reduces transmission of chikungunya virus in *Aedes aegypti*.  
444 PLoS neglected tropical diseases. 2016 Apr 28;10(4):e0004677.
- 445 21. Frentiu FD, Zakir T, Walker T, Popovici J, Pyke AT, van den Hurk A, McGraw EA,  
446 O'Neill SL. Limited dengue virus replication in field-collected *Aedes aegypti*  
447 mosquitoes infected with Wolbachia. PLoS neglected tropical diseases. 2014 Feb  
448 20;8(2):e2688.
- 449 22. Walker TJ, Johnson PH, Moreira LA, Iturbe-Ormaetxe I, Frentiu FD, McMeniman  
450 CJ, Leong YS, Dong Y, Axford J, Kriesner P, Lloyd AL. The wMel Wolbachia strain  
451 blocks dengue and invades caged *Aedes aegypti* populations. Nature. 2011 Aug  
452 25;476(7361):450-3.
- 453 23. Popovici J, Moreira LA, Poinsignon A, Iturbe-Ormaetxe I, McNaughton D, O'Neill  
454 SL. Assessing key safety concerns of a Wolbachia-based strategy to control dengue  
455 transmission by *Aedes* mosquitoes. Memorias do Instituto Oswaldo Cruz. 2010  
456 Dec;105(8):957-64.
- 457 24. De Barro PJ, Murphy B, Jansen CC, Murray J. The proposed release of the yellow  
458 fever mosquito, *Aedes aegypti* containing a naturally occurring strain of Wolbachia  
459 pipientis, a question of regulatory responsibility. Journal für Verbraucherschutz und  
460 Lebensmittelsicherheit. 2011 May 1;6(1):33-40.
- 461 25. Iturbe-Ormaetxe I, Walker T, LO'Neill S. Wolbachia and the biological control of  
462 mosquito-borne disease. EMBO reports. 2011 Jun 1;12(6):508-18.

- 463 26. Kittayapong P, Baisley KJ, Baimai V, O'Neill SL. Distribution and diversity of  
464 Wolbachia infections in Southeast Asian mosquitoes (Diptera: Culicidae). *Journal of*  
465 *medical entomology*. 2000 May;37(3):340-5.
- 466 27. Ricci I, Cancrini G, Gabrielli S, D'amelio S, Favia G. Searching for Wolbachia  
467 (Rickettsiales: Rickettsiaceae) in mosquitoes (Diptera: Culicidae): large polymerase  
468 chain reaction survey and new identifications. *Journal of medical entomology*. 2002  
469 Jul;39(4):562-7.
- 470 28. Rasgon JL, Scott TW. Impact of population age structure on Wolbachia transgene  
471 driver efficacy: ecologically complex factors and release of genetically modified  
472 mosquitoes. *Insect biochemistry and molecular biology*. 2004 Jul 31;34(7):707-13.
- 473 29. Hilgenboecker K, Hammerstein P, Schlattmann P, Telschow A, Werren JH. How  
474 many species are infected with Wolbachia?—a statistical analysis of current data.  
475 *FEMS microbiology letters*. 2008 Apr 1;281(2):215-20.
- 476 30. Wiwatanaratnabutr I. Geographic distribution of wolbachial infections in  
477 mosquitoes from Thailand. *Journal of invertebrate pathology*. 2013 Nov  
478 30;114(3):337-40.
- 479 31. Nugapola NN, De Silva WP, Karunaratne SP. Distribution and phylogeny of  
480 Wolbachia strains in wild mosquito populations in Sri Lanka. *Parasites & vectors*.  
481 2017 May 10;10(1):230.
- 482 32. Baldini F, Segata N, Pompon J, Marcenac P, Shaw WR, Dabiré RK, Diabaté A,  
483 Levashina EA, Catteruccia F. Evidence of natural Wolbachia infections in field  
484 populations of *Anopheles gambiae*. *Nature communications*. 2014 Jun 6;5.
- 485 33. Shaw WR, Marcenac P, Childs LM, Buckee CO, Baldini F, Sawadogo SP, Dabiré  
486 RK, Diabaté A, Catteruccia F. Wolbachia infections in natural *Anopheles* populations  
487 affect egg laying and negatively correlate with *Plasmodium* development. *Nature*  
488 *communications*. 2016;7.
- 489 34. Gomes FM, Hixson BL, Tyner MD, Ramirez JL, Canepa GE, e Silva TL, Molina-  
490 Cruz A, Keita M, Kane F, Traoré B, Sogoba N. Effect of naturally occurring  
491 Wolbachia in *Anopheles gambiae* sl mosquitoes from Mali on *Plasmodium*

- 492           falciparum malaria transmission. Proceedings of the National Academy of Sciences.  
493           2017 Nov 7:201716181.
- 494       35. Teo CH, Lim PK, Voon K, Mak JW. Detection of dengue viruses and Wolbachia in  
495           Aedes aegypti and Aedes albopictus larvae from four urban localities in Kuala  
496           Lumpur, Malaysia. Tropical Biomedicine. 2017 Sep 1;34(3):583-97.
- 497       36. Coon KL, Brown MR, Strand MR. Mosquitoes host communities of bacteria that are  
498           essential for development but vary greatly between local habitats. Molecular ecology.  
499           2016 Nov 1;25(22):5806-26.
- 500       37. Thongsripong P, Chandler JA, Green AB, Kittayapong P, Wilcox BA, Kapan DD,  
501           Bennett SN. Mosquito vector-associated microbiota: Metabarcoding bacteria and  
502           eukaryotic symbionts across habitat types in Thailand endemic for dengue and other  
503           arthropod-borne diseases. Ecology and evolution. 2018 Jan 1;8(2):1352-68.
- 504       38. Carvajal TM, Viacrusis KM, Hernandez LF, Ho HT, Amalin DM, Watanabe K.  
505           Machine learning methods reveal the temporal pattern of dengue incidence using  
506           meteorological factors in metropolitan Manila, Philippines. BMC infectious diseases.  
507           2018 Dec;18(1):183.
- 508       39. Rueda LM. Pictorial keys for the identification of mosquitoes (Diptera: Culicidae)  
509           associated with dengue virus transmission. Walter Reed Army Inst Of Research  
510           Washington Dc Department Of Entomology; 2004 Aug 3.
- 511       40. Crane S. DNA Extraction From Archival Museum Insect Specimens. 2011. Accessed  
512           Mar 2015. Available from: [https://s3-eu-west-1.amazonaws.com/pfigshare-u-](https://s3-eu-west-1.amazonaws.com/pfigshare-u-files/1114092/extractionmuseum.pdf)  
513           files/1114092/extractionmuseum.pdf
- 514       41. Zhou W, Rousset F, O'Neill S. Phylogeny and PCR-based classification of  
515           Wolbachia strains using wsp gene sequences. Proceedings of the Royal Society of  
516           London B: Biological Sciences. 1998 Mar 22;265(1395):509-15
- 517       42. Simoes PM, Mialdea G, Reiss D, Sagot MF, Charlat S. Wolbachia detection: an  
518           assessment of standard PCR protocols. Molecular Ecology Resources. 2011 May  
519           1;11(3):567-72.

- 520 43. Tamura K, Stecher G, Peterson D, Filipski A, Kumar S. MEGA6: molecular  
521 evolutionary genetics analysis version 6.0. *Molecular biology and evolution*. 2013  
522 Dec 1;30(12):2725-9.
- 523 44. Guindon S, Dufayard J, Lefort V, Anisimova M, Hordijk W, Gascuel O. New  
524 algorithms and methods to estimate maximum-likelihood phylogenies: assessing the  
525 performance of PhyML 3.0. *Syst Biol*. 2010;59(3):307–21.
- 526 45. Lefort V, Longueville JE, Gascuel O. SMS: Smart Model Selection in PhyML.  
527 *Molecular Biology and Evolution*. 2017 May 11:msx149.
- 528 46. R Development Core Team. R: A language and environment for statistical computing.  
529 R Foundation for Statistical Computing, Vienna, Austria. 2016
- 530 47. Baddeley A, Turner R. Spatstat: an R package for analyzing spatial point patterns.  
531 *Journal of statistical software*. 2005 Jan 26;12(6):1-42.
- 532 48. Augustinos AA, Santos-Garcia D, Dionyssopoulou E, Moreira M, Papapanagiotou A,  
533 Scarvelakis M, Doudoumis V, Ramos S, Aguiar AF, Borges PA, Khadem M.  
534 Detection and characterization of Wolbachia infections in natural populations of  
535 aphids: is the hidden diversity fully unraveled?. *PloS one*. 2011 Dec 13;6(12):e28695.
- 536 49. Ahmed MZ, Breinholt JW, Kawahara AY. Evidence for common horizontal  
537 transmission of Wolbachia among butterflies and moths. *BMC evolutionary biology*.  
538 2016 May 27;16(1):118.
- 539 50. Jeyaprakash A, Hoy MA. Long PCR improves Wolbachia DNA amplification: wsp  
540 sequences found in 76% of sixty-three arthropod species. *Insect molecular biology*.  
541 2000 Aug 1;9(4):393-405.
- 542 51. Zhou W, Rousset F, O'Neill S. Phylogeny and PCR-based classification of  
543 Wolbachia strains using wsp gene sequences. *Proceedings of the Royal Society of  
544 London B: Biological Sciences*. 1998 Mar 22;265(1395):509-15.
- 545 52. Kitrayapong P, Baimai V, O'Neill SL. Field prevalence of Wolbachia in the mosquito  
546 vector *Aedes albopictus*. *The American journal of tropical medicine and hygiene*.  
547 2002 Jan 1;66(1):108-11.

- 548 53. Ellegaard KM, Klasson L, Näslund K, Bourtzis K, Andersson SG. Comparative  
549 genomics of Wolbachia and the bacterial species concept. *PLoS genetics*. 2013 Apr  
550 4;9(4):e1003381.
- 551 54. Kramer L, Grandi G, Leoni M, Passeri B, McCall J, Genchi C, Mortarino M,  
552 Bazzocchi C. Wolbachia and its influence on the pathology and immunology of  
553 *Dirofilaria immitis* infection. *Veterinary parasitology*. 2008 Dec 10;158(3):191-5.
- 554 55. Kageyama D, Narita S, Imamura T, Miyanoshta A. Detection and identification of  
555 Wolbachia endosymbionts from laboratory stocks of stored-product insect pests and  
556 their parasitoids. *Journal of stored products research*. 2010 Jan 31;46(1):13-9.
- 557 56. Perez-Losada M, Viscidi RP, Demma JC, Zenilman J, Crandall KA. Population  
558 genetics of *Neisseria gonorrhoeae* in a high-prevalence community using a  
559 hypervariable outer membrane porB and 13 slowly evolving housekeeping genes.  
560 *Molecular biology and evolution*. 2005 Sep 1;22(9):1887-902.
- 561 57. Werren JH, Bartos JD. Recombination in Wolbachia. *Current Biology*. 2001 Mar  
562 20;11(6):431-5.
- 563 58. Jiggins FM. The rate of recombination in Wolbachia bacteria. *Molecular Biology and*  
564 *Evolution*. 2002 Sep 1;19(9):1640-3.
- 565 59. Hoffmann AA, Iturbe-Ormaetxe I, Callahan AG, Phillips BL, Billington K, Axford  
566 JK, Montgomery B, Turley AP, O'Neill SL. Stability of the wMel Wolbachia  
567 infection following invasion into *Aedes aegypti* populations. *PLoS neglected tropical*  
568 *diseases*. 2014 Sep 11;8(9):e31115.
- 569 60. Hoffmann AA, Montgomery BL, Popovici J, Iturbe-Ormaetxe I, Johnson PH, Muzzi  
570 F, et al. Successful establishment of Wolbachia in *Aedes* populations to suppress  
571 dengue transmission. *Nature*. 2011;476(7361):454–U107.
- 572 61. Hedges LM, Brownlie JC, O'Neill SL, Johnson KN. Wolbachia and virus protection  
573 in insects. *Science*. 2008 Oct 31;322(5902):702-.
- 574 62. Joubert DA, Walker T, Carrington LB, De Bruyne JT, Kien DH, Hoang NL, Chau  
575 NV, Iturbe-Ormaetxe I, Simmons CP, O'Neill SL. Establishment of a Wolbachia



- 576 superinfection in *Aedes aegypti* mosquitoes as a potential approach for future  
577 resistance management. *PLoS pathogens*. 2016 Feb 18;12(2):e1005434.
- 578 63. Dale C, Moran NA. Molecular interactions between bacterial symbionts and their  
579 hosts. *Cell*. 2006 Aug 11;126(3):453-65.
- 580 64. Osborne SE, Iturbe-Ormaetxe I, Brownlie JC, O'Neill SL, Johnson KN. Antiviral  
581 protection and the importance of *Wolbachia* density and tissue tropism in *Drosophila*  
582 *simulans*. *Applied and environmental microbiology*. 2012 Oct 1;78(19):6922-9.
- 583 65. Martinez J, Longdon B, Bauer S, Chan YS, Miller WJ, Bourtzis K, Teixeira L, Jiggins  
584 FM. Symbionts commonly provide broad spectrum resistance to viruses in insects: a  
585 comparative analysis of *Wolbachia* strains. *PLoS pathogens*. 2014 Sep  
586 18;10(9):e1004369.
- 587 66. Teixeira L, Ferreira Á, Ashburner M. The bacterial symbiont *Wolbachia* induces  
588 resistance to RNA viral infections in *Drosophila melanogaster*. *PLoS biology*. 2008  
589 Dec 23;6(12):e1000002.
- 590 67. Hedges LM, Brownlie JC, O'Neill SL, Johnson KN. *Wolbachia* and virus protection  
591 in insects. *Science*. 2008 Oct 31;322(5902):702-.
- 592 68. Frentiu FDZ, Walker T, Popovici T, Pyke J, Van den Hurk AT, McGraw A, et al.  
593 Limited dengue virus replication in field-collected *Aedes aegypti* mosquitoes infected  
594 with *Wolbachia*. *PLoS Negl Trop Dis*. 2014;8:e2688.
- 595 69. Laven H. In: in *Genetics of Insect Vectors of Disease*. Wright R, Pal R, editors.  
596 Amsterdam: Elsevier; 1967. pp. 251–275.
- 597 70. Blagrove MS, Arias-Goeta C, Failloux AB, Sinkins SP. *Wolbachia* strain wMel  
598 induces cytoplasmic incompatibility and blocks dengue transmission in *Aedes*  
599 *albopictus*. *Proceedings of the National Academy of Sciences*. 2012 Jan  
600 3;109(1):255-60.

## 601 **COMPETING INTEREST**

602 The authors declare no competing interest

603 **DATA AVAILABILITY**

604 Demographic profiles (location and sex) and detection status from each individual *Ae.*  
605 *aegypti* adult mosquito used in the study are presented in the Supplementary. Accession  
606 numbers of Nucleotide sequences of PCR-amplified fragments of *wsp* and *16S* have been  
607 deposited in the GENBANK nucleotide database under accession numbers \_\_\_\_\_to  
608 \_\_\_\_\_ and \_\_\_\_\_ to \_\_\_\_\_ respectively.

609 **SUPPLEMENTAL MATERIAL**

610 **Table S1.** Demographic profile (Sex, Sampling Site Code, Location), Detection status (*wsp*  
611 and 16S rDNA) of all individual adult *Aedes aegypti* mosquitoes used in the study. Positive  
612 *Wolbachia* infection in mosquito samples presents the supergroup classification and  
613 GENBANK accession number.

614 **Figure S1.** Complete *wsp* phylogeny of *Wolbachia* from *Ae. aegypti* (n=113). The alignment  
615 was analyzed in the program PHYML and *Wolbachia* host *Dirofilaria immitis* was selected  
616 as an outgroup. All sample sequences are indicated in red dots. The condensed version of this  
617 tree is presented as Figure 1.

618 **Figure S2.** Complete *16S* rDNA phylogeny of *Wolbachia* from *Ae. aegypti* (n=85). The  
619 alignment was analyzed in the program PHYML and *Rickettsia sp.* was selected as an  
620 outgroup. All sample sequences are indicated in red dots. The condensed version of this tree  
621 is presented as Figure 2
